# Supplementary material for: Transcriptional profile in rat muscle: down-regulation networks in acute strenuous exercise
Source: PeerJ. 2021 Apr 2;9:e10500. doi: 10.7717/peerj.10500 (PMC8020866; doi:10.7717/peerj.10500)
Supplement: Supplemental Information 1 [file peerj-09-10500-s001.xlsx]

## Sheet: Sheet2
		Average expression
Genes	RNA-seq	RT-PCR	Erro Seq	Erro PCR
Cic	421987417583174	30.1395	210993708791587	1.21902
Mstn	440957105455511	30.1111	120892118462110	0.6612
NOX2	519096372811373	34.1633	53422896573479	0.538038
Nox4	372635323803581	29.2408	7.37776e+13	2.51719
Sod1	249904107023085	27.0483	5322589254678	1.00567
Sod2	478426472930437	31.6647	138877673602675	1.49266
Expression value by samples
RNA-seq	Sample 1	Sample 3	Sample 4	Sample 6	Média	Desvio
Cic	401922429303312	461703480965657	368290590921092	456033169142635	421987417583174	4.48049e+13
Mstn	706983591530811	289617869721942	577428615676101	189798344893189	4.40957e+14	2.41784e+14
NOX2	501019006225203	661649237336077	402762018684318	510955228999892	5.19096e+14	1.06846e+14
Nox4	207604560590554	296000974597719	532253133338921	454682626687129	3.72635e+14	1.47555e+14
Sod1	265457031475121	241560011034452	247408402785595	245190982797173	2.49904e+14	1.06452e+13
Sod2	605845469019393	603929047289522	641338234408299	62593141004533	4.78426e+14	2.77755e+14
RT-PCR	Sample 1	Sample 2	Sample 3	Sample 4	Sample 5	Sample 6	Média	Desvio padrão
Cic	32.129	29.2029	29.152	30.1529	30.1294	30.0709	30.1395	1.07847
Mstn	29.8241	28.6477	30.9367	32.9882	29.2484	29.0212	30.1111	1.6196
Nox2	32.84	33	34	36.51	34.3	34.33	34.1633	1.31792
Nox4	37.3799	21.4826	25.3877	25.325	34.6931	31.1765	29.2408	6.16584
Sod1	26.38	25.57	25.98	25.66	26.7	32	27.0483	2.46338
Sod2	33.6138	27.2314	27.7791	32.996	36.8131	31.5545	31.6647	3.65626
